# Supplementary material for: Suicide Risk among Patients with Substance Use Disorders, A Cross Sectional Study In Suez Canal Area Hospitals
Source: Research Square preprint supplement (doi:10.21203/rs.3.rs-3076857/v1), 2023-06-23
Supplement: Supplementary file 1 [file c2da3342cca9a53dbf8bd21a.docx]

**Study Tables**

**Table 1: Socio-Demographic Data of The Studied Groups:**

|  | | **Substance Use Disorders**  **Patients (Group A) - n=190** | | **Controls**  **(Group B) - n=30** | | **p Value** |
| --- | --- | --- | --- | --- | --- | --- |
| **Count** | **Table N %** | **Count** | **Table N %** |
| **Nationality** | **Egyptian** | ***190*** | ***86.4%*** | ***30*** | ***13.6%*** | ***0.41*** |
| **Non-Egyptian** | ***0*** | ***0%*** | ***0*** | ***0%*** |
| **Gender** | **Male** | ***148*** | ***67.3%*** | ***30*** | ***13.6%*** | ***0.099*** |
| **Female** | ***42*** | ***19.1%*** | ***0*** | ***.0%*** |
| **Occupation** | **Unemployed** | ***21*** | ***9.5%*** | ***0*** | ***.0%*** | ***0.33*** |
| **Student** | ***5*** | ***2.3%*** | ***0*** | ***.0%*** |
| **Working Student** | ***46*** | ***20.9%*** | ***0*** | ***.0%*** |
| **Clerk** | ***118*** | ***53.6%*** | ***30*** | ***13.6%*** |
| **Marital** | **Single** | ***45*** | ***20.5%*** | ***1*** | ***.5%*** | ***0.10*** |
| **Married** | ***97*** | ***44.1%*** | ***24*** | ***10.9%*** |
| **Divorced** | ***36*** | ***16.4%*** | ***0*** | ***.0%*** |
| **In a Relationship** | ***12*** | ***5.5%*** | ***5*** | ***2.3%*** |
| **Religion** | **Moslem** | ***186*** | ***84.5%*** | ***28*** | ***12.7%*** | ***0.08*** |
| **Christian** | ***4*** | ***1.8%*** | ***2*** | ***.09%*** |
| **Residence** | **Urban** | ***76*** | ***34.5%*** | ***30*** | ***13.6%*** | ***0.12*** |
| **Rural** | ***114*** | ***51.8%*** | ***0*** | ***.0%*** |
| **Hobbies** | **No Hobies** | ***136*** | ***61.8%*** | ***0*** | ***.0%*** |  |
| **Have Hobies** | ***54*** | ***24.5%*** | ***30*** | ***13.6%*** |
| **SES** | **Very Low** | ***19*** | ***8.6%*** | ***0*** | ***.0%*** | ***0.20*** |
| **Low** | ***6*** | ***2.7%*** | ***6*** | ***2.7%*** |
| **Middle** | ***109*** | ***49.5%*** | ***22*** | ***10.0%*** |
| **High** | ***56*** | ***25.5%*** | ***2*** | ***.9%*** |

|  | **Mean ± SD** | **Mean ± SD** |  |
| --- | --- | --- | --- |
| **Age (years)** | ***36*±*8*** | ***44*±*7*** | ***0.21*** |
| **Income (EGP/Month)** | ***7636*±*11098*** | ***19433*±*20623*** |
| **Education (years)** | ***8*±*3*** | ***10**±*2*** |

Sociodemographic data among all study samples.

* p Value < 0.05 Significant

** p Value < 0.01 Highly Significant

**Table 2: Mini psychiatric Symptoms Distribution among Substance Use Disorders Patients:**

|  | | **Substance Use Disorders patients (Group A) N=190** | | **Control group (Group B) N=30** | |
| --- | --- | --- | --- | --- | --- |
| **No.** | **%** | **No.** | **%** |
| **MINI_MDD** | **No** | ***151*** | ***79.5%*** | ***30*** | ***100.00%*** |
| **MDD** | ***39*** | ***20.5%*** | ***0*** | ***0.00%*** |
| **MINI_Dysthymia** | **No** | ***144*** | ***75.8%*** | ***30*** | ***100.00%*** |
| **Dysthymia** | ***46*** | ***24.2%*** | ***0*** | ***0.00%*** |
| **MINI_Suicidal_Tendency** | **No** | ***151*** | ***79.5%*** | ***30*** | ***100.00%*** |
| **Suicide** | ***39*** | ***20.5%*** | ***0*** | ***0.00%*** |
| **MINI_Mania_Hypomania** | **No** | ***174*** | ***91.6%*** | ***30*** | ***100.00%*** |
| **Mania** | ***16*** | ***8.4%*** | ***0*** | ***0.00%*** |
| **MINI_Panic** | **No** | ***186*** | ***97.9%*** | ***30*** | ***100.00%*** |
| **Panic** | ***4*** | ***2.1%*** | ***0*** | ***0.00%*** |
| **MINI_Agoraphobia** | **No** | ***168*** | ***88.4%*** | ***30*** | ***100.00%*** |
| **Agoraphobia** | ***22*** | ***11.6%*** | ***0*** | ***0.00%*** |
| **MINI_Social_Phobia** | **No** | ***180*** | ***94.7%*** | ***30*** | ***100.00%*** |
| **Social Phobia** | ***10*** | ***5.3%*** | ***0*** | ***0.00%*** |
| **MINI_OCD** | **No** | ***172*** | ***90.5%*** | ***30*** | ***100.00%*** |
| **OCD** | ***18*** | ***9.5%*** | ***0*** | ***0.00%*** |
| **MINI_PTSD** | **No** | ***185*** | ***97.4%*** | ***30*** | ***100.00%*** |
| **PTSD** | ***5*** | ***2.6%*** | ***0*** | ***0.00%*** |
| **MINI_Alcohol_Use** | **No** | ***134*** | ***70.5%*** | ***30*** | ***100.00%*** |
| **Alcohol** | ***56*** | ***29.5%*** | ***0*** | ***0.00%*** |
| **MINI_Substance_Use** | **No** | ***0*** | ***.0%*** | ***30*** | ***100.00%*** |
| **Substance** | ***190*** | ***100.0%*** | ***0*** | ***0.00%*** |
| **MINI_Psychotic_Disorder** | **No** | ***167*** | ***87.9%*** | ***30*** | ***100.00%*** |
| **Psychosis** | ***23*** | ***12.1%*** | ***0*** | ***0.00%*** |
| **MINI_Anorexia_Nervosa** | **No** | ***190*** | ***100.0%*** | ***30*** | ***100.00%*** |
| **Anorexia** | ***0*** | ***.0%*** | ***0*** | ***0.00%*** |
| **MINI_Bulemia_Nervosa** | **No** | ***188*** | ***98.9%*** | ***30*** | ***100.00%*** |
| **Bulemia** | ***2*** | ***1.1%*** | ***0*** | ***0.00%*** |
| **MINI_Generalized_Anxiety_Disorder** | **No** | ***151*** | ***79.5%*** | ***30*** | ***100.00%*** |
| **GAD** | ***39*** | ***20.5%*** | ***0*** | ***0.00%*** |
| **MINI_ASPD** | **No** | ***159*** | ***83.7%*** | ***30*** | ***100.00%*** |
| **ASPD** | ***31*** | ***16.3%*** | ***0*** | ***0.00%*** |

**Table 3: Specific Substances Use Distribution:**

|  | | **Substance Use Disorders patients (Group A) n=190** | |
| --- | --- | --- | --- |
| **Count** | **Column N %** |
| **Cannabis** | **No** | ***66*** | ***34.7%*** |
| **Cannabis** | ***124*** | ***65.3%*** |
| **Synthetics** | **No** | ***114*** | ***60.0%*** |
| **Synthetics** | ***76*** | ***40.0%*** |
| **Alcohol** | **No** | ***134*** | ***70.5%*** |
| **Alcohol** | ***56*** | ***29.5%*** |
| **Opioids** | **No** | ***143*** | ***75.3%*** |
| **Opioids** | ***47*** | ***24.7%*** |
| **Stimulants** | **No** | ***165*** | ***86.8%*** |
| **Stimulants** | ***25*** | ***13.2%*** |
| **BNZ** | **No** | ***107*** | ***56.3%*** |
| **BNZ** | ***83*** | ***43.7%*** |
| **Hallucinogens** | **No** | ***150*** | ***78.9%*** |
| **Hallucinogens** | ***40*** | ***21.1%*** |
| **Inhalants** | **No** | ***180*** | ***94.7%*** |
| **Inhalants** | ***10*** | ***5.3%*** |
| **Medication** | **No** | ***108*** | ***56.8%*** |
| **Subscription Medications** | ***82*** | ***43.2%*** |

**Table 4: Addiction Severity Index Scores among Substance Use Disorders Patients:**

|  | **Substance Use Disorders patients (Group A) - n=190** | **Control group (Group B) – n= 30** | **p value** |
| --- | --- | --- | --- |
| **Mean ± SD** | **Mean ± SD** |  |
| **ASI Alcohol Drugs** | ***5*±*2*** | ***0±0*** | ***0.000**** |
| **ASI Employment Support** | ***4*±*2*** | ***0±1*** | ***0.000**** |
| **ASI_Family Social Relationships** | ***4*±*2*** | ***0±1*** | ***0.000**** |
| **ASI Medical Status** | ***3*±*1*** | ***0±2*** | ***0.000**** |
| **ASI Legal Status** | ***3*±*3*** | ***0±0*** | ***0.000**** |
| **ASI Psychiatric Status** | ***4*±*2*** | ***0±1*** | ***0.000**** |

* p Value < 0.05 Significant

** p Value < 0.01 Highly Significant

**Table 5: Distribution of BSI Total Score among Specific MINI Symptoms Clusters:**

|  | | **Patients group A n=190** | | | | **Control Group B n=30** | | **p value for cases vs controls** |
| --- | --- | --- | --- | --- | --- | --- | --- | --- |
| **BSI within categories** | | **p Value** | **Total BSI Mean*±*SD** | **Total BSI** | |
| **Count** | **Mean*±*SD** | **Count** | **Mean*±*SD** |
| **MINI MDD** | **No** | ***151*** | ***4±2*** | ***0.039**** |  | ***30*** | ***2±1*** |  |
| **MDD** | ***39*** | ***15±6*** |
| **MINI Dysthymia** | **No** | ***144*** | ***3±3*** | ***0.001***** |
| **Dysthymia** | ***46*** | ***17±6*** |
| **MINI Mania Hypomania** | **No** | ***174*** | ***5±7*** | ***0.033**** |
| **Mania** | ***16*** | ***15±5*** |
| **MINI Panic** | **No** | ***186*** | ***6±8*** |  |
| **Panic** | ***4*** | ***11±9*** |
| **MINI Agoraphobia** | **No** | ***168*** | ***5±6*** |  |
| **Agoraphobia** | ***22*** | ***17±11*** |
| **MINI Social Phobia** | **No** | ***180*** | ***5±3*** |  |
| **Social Phobia** | ***10*** | ***22±7*** |
| **MINI OCD** | **No** | ***172*** | ***6±7*** |  |
| **OCD** | ***18*** | ***11±11*** |
| **MINI PTSD** | **No** | ***185*** | ***6±8*** |  |
| **PTSD** | ***5*** | ***12±8*** |
| **MINI Alcohol Use** | **No** | ***134*** | ***3±3*** |  |
| **Alcohol** | ***56*** | ***14±10*** |
| **MINI Substance Use** | **No** | ***0*** | ***.*** |  |
| **Substance** | ***190*** | ***6±8*** |
| **MINI Psychotic Disorder** | **No** | ***167*** | ***5±6*** | ***0.019**** |
| **Psychosis** | ***23*** | ***14±12*** |
| **MINI Anorexia Nervosa** | **No** | ***190*** | ***6±8*** |  |
| **Anorexia** | ***0*** | ***.***  ***.*** |
| **MINI Bulemia Nervosa** | **No** | ***188*** | ***6±8*** |  |
| **Bulemia** | ***2*** | ***18*** |
| **MINI Generalized Anxiety Disorder** | **No** | ***151*** | ***4±6*** | ***0.017**** |
| **GAD** | ***39*** | ***13±10*** |
| **MINI ASPD** | **No** | ***159*** | ***5±7*** |  |
| **ASPD** | ***31*** | ***11±10*** |
|  | |  | | | ***7±4*** |  | ***2±1*** | ***0.043**** |

* p Value < 0.05 Significant

** p Value < 0.01 Highly Significant

**Table 6: Distribution of BSI scores among Specific Substances Use:**

|  | | **Beck Total Score** | | **p Value** |
| --- | --- | --- | --- | --- |
| **Count** | **Mean±SD** |
| **Cannabis** | **No** | ***66*** | ***6*±*8*** |  |
| **Cannabis** | ***124*** | ***7*±*9*** |
| **Synthetics** | **No** | ***114*** | ***4*±*5*** |  |
| **Synthetics** | ***76*** | ***9*±*10*** |
| **Alcohol** | **No** | ***134*** | ***3*±*3*** | ***0.001***** |
| **Alcohol** | ***56*** | ***14*±*10*** |
| **Opioids** | **No** | ***143*** | ***4*±*6*** | ***0.031**** |
| **Opioids** | ***47*** | ***14*±*8*** |
| **Stimulants** | **No** | ***165*** | ***5*±*6*** |  |
| **Stimulants** | ***25*** | ***14*±*11*** |
| **BNZ** | **No** | ***107*** | ***6*±*8*** |  |
| **BNZ** | ***83*** | ***7*±*9*** |
| **Hallucinogens** | **No** | ***150*** | ***5*±*7*** |  |
| **Hallucinogens** | ***40*** | ***9*±*11*** |
| **Inhalants** | **No** | ***180*** | ***6*±*8*** |  |
| **Inhalants** | ***10*** | ***5*±*6*** |
| **Medication** | **No** | ***108*** | ***4*±*6*** |  |
| **Prescription Medications** | ***82*** | ***9*±*9*** |
| Total | | ***190*** | ***7*±4** |  |

BSI=Beck Suicidal Ideation Scale

* p Value < 0.05 Significant

** p Value < 0.01 Highly Significant

**Table 7: Comparison of ARS Responses among The Studied Groups:**

|  | **Substance Use Disorders patients (Group A) - n=190** | **Controls (Group B) - n=30** | **p Value** |
| --- | --- | --- | --- |
| **Mean±SD** | **Mean±SD** |
| **Collective Activities** | ***1*±*1*** | ***2*±*1**** | ***0.04**** |
| **Individual Activities** | ***1*±*1*** | ***2*±*1**** | ***0.023**** |
| **Importance** | ***1*±*1*** | ***2*** |  |
| **Does Faith Help** | ***1*** | ***2*±*1**** | ***0.012**** |
| **Degree of Faith** | ***2*±*1*** | ***3*±*1**** | ***0.042**** |
| **Religiosity Score** | ***8*±*3*** | ***11*±*2**** | ***0.013**** |

ARS=Arab Religiosity Scale

* p Value < 0.05 Significant

** p Value < 0.01 Highly Significant

**Table 8: Comparison of BSI scores among Mono Substance and Poly Substance Use Disorders Patients:**

|  | **Mono** | | **Poly** | | **p Value** |
| --- | --- | --- | --- | --- | --- |
| **n** | **Mean±SD** | **n** | **Mean±SD** |
| **Beck Total Score** | ***16*** | ***2*±*3*** | ***174*** | ***7*±*8**** | ***0.048**** |
| **Active Domain** | ***16*** | ***2*±*2*** | ***174*** | ***4*±*5*** |  |
| **Preparation Domain** | ***16*** | ***0*** | ***174*** | ***1*±*1*** |  |
| **Passive Domain** | ***16*** | ***0*±*1*** | ***174*** | ***1*±*1*** |  |

BSI=Beck Suicidal Ideation Scale

* p Value < 0.05 Significant

** p Value < 0.01 Highly Significant

**Table 9: Comparison of BSI Scores between Those who Have A Positive Family History of Suicidality and Those Have not:**

|  | **Negative** | | **Positive** | | **p Value** |
| --- | --- | --- | --- | --- | --- |
| **n** | **Mean±SD** | **n** | **Mean±SD** |
| **Beck Total Score** | ***203*** | ***4*±5** | ***17*** | ***25*±7** | ***0.029**** |
| **Active Domain** | ***203*** | ***2*±3** | ***17*** | ***15*±4** |  |
| **Preparation Domain** | ***203*** | ***0*** | ***17*** | ***4*±1** |  |
| **Passive Domain** | ***203*** | ***1*±1** | ***17*** | ***4*±1** |  |
| **Number of past attempts** | ***203*** | ***0*** | ***17*** | ***3*±1** |  |

BSI=Beck Suicidal Ideation Scale

* p Value < 0.05 Significant

** p Value < 0.01 Highly Significant

**Table 10: Comparison of BSI Scores between Those who Have A Positive Family History of Suicidality and Those Have not:**

|  | **Family History** | **Substance Use Disorders patients (Group A) - n=190** | | **Controls (Group B) - n=30** | | **p Value** |
| --- | --- | --- | --- | --- | --- | --- |
|  | **n** | **Mean±SD** | **n** | **Mean±SD** |
| **Beck Total Score** | ***Positive*** | ***16*** | ***24*±5** | ***1*** | ***21*±0** |  |
| ***Negative*** | ***174*** | ***4*±6** | ***29*** | ***2*±3** | ***0.001***** |
| **Active Domain** | ***Positive*** | ***16*** | ***7*±12** | ***1*** | ***8*±0** |  |
| ***Negative*** | ***174*** | ***3*±16** | ***29*** | ***2*±13** |  |
| **Preparation Domain** | ***Positive*** | ***16*** | ***6*±10** | ***1*** | ***7*±0** |  |
| ***Negative*** | ***174*** | ***4*±11** | ***29*** | ***3*±9** |  |
| **Passive Domain** | ***Positive*** | ***16*** | ***8*±13** | ***1*** | ***8*±0** |  |
| ***Negative*** | ***174*** | ***5*±9** | ***29*** | ***2*±16** |  |

BSI=Beck Suicidal Ideation Scale

* p Value < 0.05 Significant

** p Value < 0.01 Highly Significant

**Table 11: Comparison Between Alcohol abusers with Major Depressive Disorder vs. Other Patients:**

|  | **Alcohol + MDD** | | **Any Other Combination** | | **p Value** |
| --- | --- | --- | --- | --- | --- |
| **n** | **Mean ± SD** | **n** | **Mean ± SD** |
| **Age** | ***28*** | ***37*±*8*** | ***162*** | ***35*±*9*** |  |
| **Income** | ***28*** | ***19089*±*22548*** | ***162*** | ***5656*±*5706*** | ***0.05**** |
| **Education** | ***28*** | ***9*±*3*** | ***162*** | ***10*±*3*** |  |
|  |  |  |  |  |  |
| **Religiosity Score** | ***28*** | ***4*±*3*** | ***162*** | ***8*±*3*** | ***0.031**** |
| **ASI :** |  |  |  |  |  |
| **Alcohol Drugs** | ***28*** | ***7*±*2*** | ***162*** | ***3*±*1*** |  |
| **Employment Support** | ***28*** | ***7*±*3*** | ***162*** | ***3*±*2*** |  |
| **Family Social Relationships** | ***28*** | ***7*±*3*** | ***162*** | ***3*±*1*** | ***0.042**** |
| **Medical Status** | ***28*** | ***3*±*2*** | ***162*** | ***3*±*1*** |  |
| **Legal Status** | ***28*** | ***6*±*3*** | ***162*** | ***2*±*2*** |  |
| **Psychiatric Status** | ***28*** | ***7*±*3*** | ***162*** | ***3*±*2*** |  |
|  |  |  |  |  |  |
| **Beck Total Score** | ***28*** | ***20*±*7*** | ***162*** | ***4*±*5*** | ***0.001***** |
| **Active Domain** | ***28*** | ***12*±*4*** | ***162*** | ***2*±*3*** | ***0.022**** |
| **Preparation Domain** | ***28*** | ***3*±*1*** | ***162*** | ***0*±*1*** | ***0.019**** |
| **Passive Domain** | ***28*** | ***3*±*1*** | ***162*** | ***1*±*1*** | ***0.011**** |
|  |  |  |  |  |  |
| **Number of past attempts** | ***28*** | ***2*±*1*** | ***162*** | ***0*±*1*** | ***0.001***** |

MDD= Major Depressive Disorder

* p Value < 0.05 Significant

** p Value < 0.01 Highly Significant

**Table 12: Comparison between Opioids abusers with Major Depressive Disorder vs. Other Patients:**

|  | **Opioids + MDD** | | **Any other combination** | | **p Value** |
| --- | --- | --- | --- | --- | --- |
| **n** | **mean±SD** | **n** | **mean±SD** |
| **Age** | ***22*** | ***37*±*8*** | ***168*** | ***35*±*9*** |  |
| **Income** | ***22*** | ***20705*±*24567*** | ***168*** | ***5924*±*6168*** |  |
| **Education** | ***22*** | ***9*±*3*** | ***168*** | ***10*±*3*** |  |
|  |  |  |  |  |  |
| **Religiosity Score** | ***22*** | ***4*±*3*** | ***168*** | ***8*±*3*** |  |
| **ASI :** |  |  |  |  |  |
| **Alcohol Drugs** | ***22*** | ***7*±*2*** | ***168*** | ***4*±*1*** | **0.044*** |
| **Employment Support** | ***22*** | ***7*±*3*** | ***168*** | ***3*±*2*** | **0.046*** |
| **Family Social Relationships** | ***22*** | ***7*±*3*** | ***168*** | ***3*±*2*** | **0.039*** |
| **Medical Status** | ***22*** | ***3*±*2*** | ***168*** | ***3*±*1*** | **0.043*** |
| **Legal Status** | ***22*** | ***6*±*3*** | ***168*** | ***2*±*2*** | **0.015*** |
| **Psychiatric Status** | ***22*** | ***8*±*2*** | ***168*** | ***3*±*2*** | **0.026*** |
| **BSIS** |  |  |  |  |  |
| **Beck Total Score** | ***22*** | ***17*±*8*** | ***168*** | ***5*±*7*** | **0.019*** |
| **Active Domain** | ***22*** | ***10*±*4*** | ***168*** | ***3*±*4*** |  |
| **Preparation Domain** | ***22*** | ***3*±*1*** | ***168*** | ***0*±*1*** |  |
| **Passive Domain** | ***22*** | ***3*±*1*** | ***168*** | ***1*±*1*** | **0.022*** |
| **Number of past attempts** | ***22*** | ***2*±*1*** | ***168*** | ***0*±*1*** |  |

MDD= Major Depressive Disorder

* p Value < 0.05 Significant

** p Value < 0.01 Highly Significant

**Table 13: Correlation Matrix between BSI Scores vs. Other Study Variables:**

|  | **Beck Total Score** | **Active Domain** | **Preparation Domain** | **Passive Domain** |
| --- | --- | --- | --- | --- |
| **SES** | ***-.640***** | ***-.595***** | ***-.668***** | ***-.605***** |
| **Collective Activities** | ***-.518***** | ***-.459***** | ***-.518***** | ***-.571***** |
| **Individual Activities** | ***-.473***** | ***-.437***** | ***-.470***** | ***-.491***** |
| **Importance** | ***-.395***** | ***-.375***** | ***-.336***** | ***-.466***** |
| **Does Faith Help** | ***-.341***** | ***-.336***** | ***-.290***** | ***-.381***** |
| **Degree of Faith** | ***-.509***** | ***-.482***** | ***-.462***** | ***-.560***** |
| **Religiosity Score** | ***-.583***** | ***-.543***** | ***-.544***** | ***-.641***** |
| **Alcohol_Drugs** | ***.758***** | ***.718***** | ***.710***** | ***.786***** |
| **Employment_Support** | ***.776***** | ***.737***** | ***.752***** | ***.769***** |
| **Family_Social_Relationships** | ***.743***** | ***.703***** | ***.719***** | ***.754***** |
| **Medical_Status** | ***.143**** | ***.158**** | ***.084*** | ***.197***** |
| **Legal_Status** | ***.754***** | ***.717***** | ***.748***** | ***.722***** |
| **Psychiatric_Status** | ***.775***** | ***.740***** | ***.745***** | ***.771***** |
| **Number of past attempts** | ***.928***** | ***.893***** | ***.916***** | ***.891***** |
| **Family History of Suicide** | ***.764***** | ***.720***** | ***.746***** | ***.746***** |
| **Suicidality preceded addiction** | ***.361***** | ***.383***** | ***.315***** | ***.326***** |
| **Sleeping Difficulties** | ***.748***** | ***.723***** | ***.714***** | ***.729***** |
| **Pain Symptoms** | ***.786***** | ***.731***** | ***.759***** | ***.761***** |
| **Aggressive Behaviour** | ***.352***** | ***.374***** | ***.324***** | ***.335***** |
| **Impulsivity** | ***.261***** | ***.283***** | ***.215***** | ***.226***** |
| **Low self esteem** | ***.454***** | ***.397***** | ***.448***** | ***.422***** |
| **History of sexual abuse** | ***.814***** | ***.790***** | ***.786***** | ***.806***** |
| **History of physical abuse** | ***.352***** | ***.361***** | ***.315***** | ***.327***** |
| **History of emotional abuse** | ***.343***** | ***.359***** | ***.326***** | ***.338***** |
| **Experience of stressful life events** | ***.339***** | ***.349***** | ***.337***** | ***.341***** |
| **Self injurious behaviour** | ***.917***** | ***.896***** | ***.905***** | ***.898***** |
| **. Correlation is significant at the 0.01 level (2-tailed). | | | | |
| *. Correlation is significant at the 0.05 level (2-tailed). | | | | |

**Table 14: Historical Variables among the Studied Groups:**

|  | **Substance Use Disorders (Group A) - N=190** | | **Controls (Group B) - N=30** | | **p Value** |
| --- | --- | --- | --- | --- | --- |
| **Count** | **Table N %** | **Count** | **Table N %** |
| **Suicidality preceded addiction** | ***23*** | ***12.11%*** |  |  |  |
| **Sleeping Difficulties** | ***131*** | ***68.95%*** | ***6*** | ***20.00%*** | ***0.029**** |
| **Pain Symptoms** | ***16*** | ***8.42%*** | ***1*** | ***3.33%*** | ***0.009***** |
| **Aggressive Behaviour** | ***37*** | ***19.47%*** | ***0*** | ***0.00%*** | ***0.001***** |
| **Impulsivity** | ***31*** | ***16.32%*** | ***2*** | ***6.67%*** | ***0.017**** |
| **Low self esteem** | ***52*** | ***27.37%*** | ***4*** | ***13.33%*** | ***0.048**** |
| **History of sexual abuse** | ***26*** | ***13.68%*** | ***0*** | ***0.00%*** | ***0.045**** |
| **History of physical abuse** | ***49*** | ***25.79%*** | ***6*** | ***20.00%*** |  |
| **History of emotional abuse** | ***56*** | ***29.47%*** | ***7*** | ***23.33%*** | ***0.033**** |
| **Experience of stressful life events** | ***73*** | ***38.42%*** | ***4*** | ***13.33%*** | ***0.001***** |
| **Self injurious behaviour** | ***47*** | ***24.74%*** | ***0*** | ***0.00%*** | ***0.001***** |

* p Value < 0.05 Significant

** p Value < 0.01 Highly Significant

**Regression Analysis :**

**Model 1 : Table 15 : Effect of model 1 on BSI total score:**

| **Model** | **Unstandardized Coefficients** | | **Standardized Coefficients** | **t** | **Sig.** |
| --- | --- | --- | --- | --- | --- |
| **B** | **Std. Error** | **Beta** |
| **(Constant)** | ***-4.237*** | ***3.549*** |  | ***-1.194*** | ***.234*** |
| **SES** | ***.826*** | ***.711*** | ***.089*** | ***1.161*** | ***.247*** |
| **Collective Activities** | ***.349*** | ***.456*** | ***.040*** | ***.767*** | ***.444*** |
| **Individual Activities** | ***-.069*** | ***.430*** | ***-.007*** | ***-.161*** | ***.872*** |
| **Importance** | ***-.249*** | ***.514*** | ***-.022*** | ***-.483*** | ***.629*** |
| **Does Faith Help** | ***1.076*** | ***.633*** | ***.066*** | ***1.699*** | ***.091*** |
| **Degree of Faith** | ***-.171*** | ***.394*** | ***-.023*** | ***-.434*** | ***.665*** |
| **Religiosity Score** | ***-2.042*** | ***.301*** | ***-.110*** | ***-1.870*** | ***.042*** |
| **ASI_Alcohol_Drugs** | ***-.440*** | ***.352*** | ***-.103*** | ***-1.249*** | ***.213*** |
| **ASI_Employment_Support** | ***.437*** | ***.295*** | ***.125*** | ***1.483*** | ***.140*** |
| **ASI_Family_Social_Relationships** | ***.481*** | ***.243*** | ***.127*** | ***1.980*** | ***.049*** |
| **ASI_Medical_Status** | ***-.131*** | ***.206*** | ***-.020*** | ***-.636*** | ***.526*** |
| **ASI_Legal_Status** | ***.534*** | ***.238*** | ***.173*** | ***2.240*** | ***.026*** |
| **ASI_Psychiatric_Status** | ***.199*** | ***.308*** | ***.057*** | ***.647*** | ***.519*** |
| **Family History of Suicide** | ***8.375*** | ***1.344*** | ***.304*** | ***6.234*** | ***.000*** |
| **Mono vs Poly Substance abuse** | ***.709*** | ***.930*** | ***.025*** | ***.762*** | ***.447*** |
| **Any Previous Attemp** | ***9.040*** | ***.957*** | ***.473*** | ***9.449*** | ***.000*** |
| **Number of previous attempts** | ***4.603*** | ***.863*** | ***.367*** | ***4.301*** | ***.001*** |
| **Suicidality preceded addiction** | ***.719*** | ***.830*** | ***.125*** | ***.752*** | ***.437*** |
| **Sleeping Dificulties** | ***.608*** | ***.721*** | ***.022*** | ***.832*** | ***.346*** |
| **Pain Symptoms** | ***.518*** | ***.834*** | ***.321*** | ***.753*** | ***.536*** |
| **Aggressive Behaviour** | ***.615*** | ***.826*** | ***.626*** | ***.562*** | ***.349*** |
| **Impulsivity** | ***.812*** | ***.831*** | ***.521*** | ***.531*** | ***.597*** |
| **Low self esteem** | ***.618*** | ***.821*** | ***.195*** | ***.972*** | ***.638*** |
| **History of sexual abuse** | ***2.176*** | ***.933*** | ***.166*** | ***2.699*** | ***.041*** |
| **History of physical abuse** | ***.619*** | ***.820*** | ***.724*** | ***.612*** | ***.525*** |
| **History of emotional abuse** | ***.918*** | ***.534*** | ***.423*** | ***.663*** | ***.143*** |
| **Experience of stressful life events** | ***.799*** | ***.831*** | ***.521*** | ***.661*** | ***.546*** |
| **Self injurious behaviour** | ***5.073*** | ***.936*** | ***.486*** | ***5.138*** | ***.001*** |

**Model 2 : Table 16 : Effect of specific substances and related variables on suicide**

| **Model** | | **Unstandardized Coefficients** | | **Standardized Coefficients** | **t** | **Sig.** |
| --- | --- | --- | --- | --- | --- | --- |
| **B** | **Std. Error** | **Beta** |
| **2** | **(Constant)** | ***1.830*** | ***1.452*** |  | ***1.261*** | ***.211*** |
| **Cannabis** | ***.184*** | ***1.047*** | ***.009*** | ***.176*** | ***.861*** |
| **Synthetics** | ***1.864*** | ***1.027*** | ***.207*** | ***3.762*** | ***.000*** |
| **Alcohol** | ***2.058*** | ***1.653*** | ***.003*** | ***.035*** | ***.032*** |
| **Opioids** | ***1.475*** | ***1.921*** | ***.075*** | ***.768*** | ***.445*** |
| **Stimulants** | ***2.418*** | ***1.234*** | ***.104*** | ***1.960*** | ***.053*** |
| **BNZ** | ***.030*** | ***.955*** | ***.002*** | ***.031*** | ***.975*** |
| **Hallucinogens** | ***2.330*** | ***1.243*** | ***.104*** | ***1.875*** | ***.064*** |
| **Inhalants** | ***.185*** | ***5.029*** | ***.002*** | ***.037*** | ***.971*** |
| **Medication** | ***-.246*** | ***1.058*** | ***-.013*** | ***-.233*** | ***.816*** |
| **Medical_Disorder** | ***-1.527*** | ***1.380*** | ***-.065*** | ***-1.107*** | ***.272*** |
| **Physical_Injuries** | ***-.859*** | ***.997*** | ***-.046*** | ***-.861*** | ***.391*** |
| **Alcohol + MDD** | ***3.449*** | ***2.452*** | ***.167*** | ***1.407*** | ***.013*** |
| **Alcohol + BAD** | ***5.027*** | ***1.720*** | ***.124*** | ***2.341*** | ***.022*** |
| **Opioids + MDD** | ***-2.795*** | ***2.419*** | ***-.125*** | ***-1.155*** | ***.251*** |
| **Alcohol + Dysthymia** | ***7.593*** | ***2.711*** | ***.607*** | ***4.276*** | ***.000*** |

**Model 3 : Table 17 : Effect of MINI symptoms on BSI score**

| **Model** | | **Unstandardized Coefficients** | | **Standardized Coefficients** | **t** | **Sig.** |
| --- | --- | --- | --- | --- | --- | --- |
| **B** | **Std. Error** | **Beta** |
| **3** | **(Constant)** | ***1.982*** | ***.403*** |  | ***4.923*** | ***.000*** |
| **MINI_MDD** | ***2.982*** | ***1.221*** | ***.020*** | ***.313*** | ***.045*** |
| **MINI_Dysthymia** | ***3.037*** | ***1.253*** | ***.438*** | ***6.416*** | ***.000*** |
| **MINI_Mania_Hypomania** | ***3.200*** | ***1.268*** | ***.113*** | ***2.524*** | ***.013*** |
| **MINI_Panic** | ***-2.786*** | ***2.778*** | ***-.051*** | ***-1.003*** | ***.317*** |
| **MINI_Agoraphobia** | ***2.065*** | ***1.365*** | ***.084*** | ***1.513*** | ***.132*** |
| **MINI_Social_Phobia** | ***3.467*** | ***1.699*** | ***.240*** | ***4.983*** | ***.000*** |
| **MINI_OCD** | ***-1.907*** | ***1.295*** | ***-.071*** | ***-1.473*** | ***.142*** |
| **MINI_PTSD** | ***-1.228*** | ***2.584*** | ***-.025*** | ***-.475*** | ***.635*** |
| **MINI_Psychotic_Disorder** | ***3.819*** | ***1.244*** | ***.158*** | ***3.070*** | ***.002*** |
| **MINI_Bulemia_Nervosa** | ***2.385*** | ***3.616*** | ***.031*** | ***.659*** | ***.510*** |
| **MINI_Generalized_Anxiety_Disorder** | ***2.016*** | ***1.110*** | ***.104*** | ***1.816*** | ***.071*** |
| **MINI_ASPD** | ***-1.343*** | ***1.003*** | ***-.063*** | ***-1.339*** | ***.182*** |
| **BPD** | ***-.303*** | ***1.133*** | ***-.013*** | ***-.267*** | ***.790*** |
